# Supplementary material
Source: MDPI journal article supplement (https://www.mdpi.com/2227-7390/10/1/42)
Supplement: s1 [file s1]

# Supplementary Materials

## MODEL ESTIMATES FOR TOP10% AND TOP25% PUBLICATIONS AND CITATIONS

### TOP10% PUBLICATION

Table S1. SUR estimates: reduced Translog function

|                                             | F05 - Science |         |       | F06 – Computer Science |         |       | F07 - Engineering |         |       | F08 - Agriculture |         |       | F09 - Medicine |         |       |
|---------------------------------------------|---------------|---------|-------|------------------------|---------|-------|-------------------|---------|-------|-------------------|---------|-------|----------------|---------|-------|
|                                             | Coeff         | SE      | Sign. | Coeff                  | SE      | Sign. | Coeff             | SE      | Sign. | Coeff             | SE      | Sign. | Coeff          | SE      | Sign. |
| <b>OUTPUT Eq. 1: GRADUATES</b>              |               |         |       |                        |         |       |                   |         |       |                   |         |       |                |         |       |
| X <sub>1</sub> : Academic staff in the area | 0.431         | 0.245   | 0.079 | 0.748                  | 0.740   | 0.313 | -0.806            | 0.499   | 0.106 | -0.274            | 0.337   | 0.416 | 0.062          | 0.241   | 0.797 |
| X <sub>1</sub> <sup>^2</sup>                | 0.075         | 0.049   | 0.127 | -0.099                 | 0.192   | 0.606 | -0.186            | 0.082   | 0.023 | 0.019             | 0.050   | 0.695 | -0.029         | 0.020   | 0.148 |
| X <sub>2</sub> : Students in the area       | 0.892         | 0.222   | 0.000 | 1.090                  | 0.472   | 0.021 | 2.304             | 0.551   | 0.000 | -0.070            | 0.435   | 0.872 | 0.656          | 0.450   | 0.145 |
| X <sub>2</sub> <sup>^2</sup>                | 0.092         | 0.048   | 0.053 | -0.008                 | 0.123   | 0.950 | -0.333            | 0.142   | 0.019 | 0.121             | 0.067   | 0.072 | 0.037          | 0.078   | 0.636 |
| X <sub>1</sub> * X <sub>2</sub>             | -0.223        | 0.124   | 0.071 | -0.110                 | 0.250   | 0.658 | 0.433             | 0.218   | 0.047 | 0.061             | 0.098   | 0.536 | 0.011          | 0.077   | 0.891 |
| Constant                                    | -2.285        | 1.203   | 0.058 | -2.719                 | 1.676   | 0.105 | -3.582            | 1.135   | 0.002 | 2.817             | 1.687   | 0.095 | -0.084         | 1.394   | 0.952 |
| <b>OUTPUT Eq. 2: PUB10</b>                  |               |         |       |                        |         |       |                   |         |       |                   |         |       |                |         |       |
| X <sub>1</sub> : Academic staff in the area | -0.439        | 0.582   | 0.451 | -1.739                 | 1.733   | 0.316 | -1.407            | 1.436   | 0.327 | -0.646            | 0.620   | 0.298 | 1.412          | 0.729   | 0.053 |
| X <sub>1</sub> <sup>^2</sup>                | 0.498         | 0.117   | 0.000 | 0.420                  | 0.450   | 0.350 | 0.259             | 0.235   | 0.270 | -0.140            | 0.091   | 0.126 | 0.235          | 0.060   | 0.000 |
| X <sub>2</sub> : Students in the area       | 0.050         | 0.528   | 0.924 | 2.049                  | 1.104   | 0.063 | 0.270             | 1.586   | 0.865 | -1.688            | 0.801   | 0.035 | -2.784         | 1.363   | 0.041 |
| X <sub>2</sub> <sup>^2</sup>                | 0.083         | 0.113   | 0.465 | -0.385                 | 0.288   | 0.181 | -0.168            | 0.409   | 0.681 | 0.226             | 0.124   | 0.068 | 0.529          | 0.235   | 0.025 |
| X <sub>1</sub> * X <sub>2</sub>             | -0.248        | 0.294   | 0.399 | 0.208                  | 0.584   | 0.721 | 0.226             | 0.626   | 0.718 | 0.383             | 0.181   | 0.034 | -0.465         | 0.234   | 0.046 |
| Constant                                    | 2.552         | 2.858   | 0.372 | -1.127                 | 3.923   | 0.774 | 7.398             | 3.266   | 0.024 | 9.912             | 3.107   | 0.001 | 9.875          | 4.222   | 0.019 |
|                                             | Correlation   | Chi2(1) | Sign  | Correlation            | Chi2(1) | Sign  | Correlation       | Chi2(1) | Sign  | Correlation       | Chi2(1) | Sign  | Correlation    | Chi2(1) | Sign  |
| BP test                                     | 0.268         | 14.005  | 0.000 | 0.4186                 | 25.229  |       | 0.2706            | 10.175  | 0.001 | 0.0473            | 0.069   | 0.792 | 0.1319         | 3.064   | 0.080 |

Table S2. SUR estimates: extended Translog function with control factors

|                                             | F05 - Science |         |       | F06 – Computer Science |         |       | F07 - Engineering |         |       | F08 - Agriculture |         |       | F09 - Medicine |         |       |
|---------------------------------------------|---------------|---------|-------|------------------------|---------|-------|-------------------|---------|-------|-------------------|---------|-------|----------------|---------|-------|
|                                             | Coeff         | SE      | Sign. | Coeff                  | SE      | Sign. | Coeff             | SE      | Sign. | Coeff             | SE      | Sign. | Coeff          | SE      | Sign. |
| <b>OUTPUT Eq. 1: GRADUATES</b>              |               |         |       |                        |         |       |                   |         |       |                   |         |       |                |         |       |
| X <sub>1</sub> : Academic staff in the area | 0.415         | 0.247   | 0.093 | 1.462                  | 0.700   | 0.037 | -0.240            | 0.459   | 0.600 | -0.297            | 0.365   | 0.417 | 0.460          | 0.323   | 0.154 |
| X <sub>1</sub> <sup>^2</sup>                | -0.051        | 0.048   | 0.285 | -0.223                 | 0.183   | 0.224 | -0.238            | 0.077   | 0.002 | 0.034             | 0.049   | 0.484 | -0.018         | 0.021   | 0.393 |
| X <sub>2</sub> : Students in the area       | 0.523         | 0.228   | 0.022 | 1.106                  | 0.510   | 0.030 | 1.761             | 0.518   | 0.001 | -0.039            | 0.489   | 0.937 | -1.219         | 0.748   | 0.103 |
| X <sub>2</sub> <sup>^2</sup>                | 0.108         | 0.045   | 0.017 | 0.024                  | 0.124   | 0.848 | -0.200            | 0.133   | 0.133 | 0.111             | 0.076   | 0.145 | 0.350          | 0.127   | 0.006 |
| X <sub>1</sub> * X <sub>2</sub>             | -0.104        | 0.119   | 0.378 | -0.212                 | 0.234   | 0.367 | 0.303             | 0.201   | 0.131 | 0.054             | 0.110   | 0.622 | -0.120         | 0.102   | 0.239 |
| International Collaboration                 | 0.018         | 0.004   | 0.000 | 0.000                  | 0.006   | 0.988 | 0.004             | 0.007   | 0.549 | -0.002            | 0.015   | 0.920 | 0.016          | 0.005   | 0.001 |
| Specialization Index                        | -1.160        | 0.362   | 0.001 | -0.314                 | 0.485   | 0.517 | 0.137             | 0.446   | 0.758 | -1.734            | 1.478   | 0.240 | -0.805         | 0.356   | 0.024 |
| Base foundation year                        | 0.000         | 0.000   | 0.966 | 0.000                  | 0.000   | 0.036 | 0.000             | 0.000   | 0.366 | 0.000             | 0.000   | 0.775 | 0.000          | 0.000   | 0.018 |
| Legal status (ref. Public university)       |               |         |       |                        |         |       |                   |         |       |                   |         |       |                |         |       |
| Private university                          | -0.244        | 0.356   | 0.494 | 0.355                  | 0.465   | 0.445 |                   |         |       | 0.485             | 0.457   | 0.288 | 0.271          | 0.255   | 0.288 |
| University size (# students enrolled)       | -0.003        | 0.002   | 0.174 | 0.003                  | 0.003   | 0.403 | -0.002            | 0.002   | 0.295 | -0.012            | 0.007   | 0.080 | -0.012         | 0.003   | 0.000 |
| Total publications in the area              | 0.004         | 0.002   | 0.013 | 0.056                  | 0.013   | 0.000 | 0.017             | 0.004   | 0.000 | 0.029             | 0.025   | 0.234 | 0.002          | 0.001   | 0.123 |
| Constant                                    | -0.351        | 1.333   | 0.792 | -4.804                 | 1.911   | 0.012 | -3.673            | 1.078   | 0.001 | 4.324             | 2.332   | 0.064 | 4.930          | 2.358   | 0.037 |
| <b>OUTPUT Eq. 2: PUB10</b>                  |               |         |       |                        |         |       |                   |         |       |                   |         |       |                |         |       |
| X <sub>1</sub> : Academic staff in the area | -0.841        | 0.556   | 0.130 | 1.741                  | 1.103   | 0.115 | 0.588             | 0.918   | 0.522 | 0.514             | 0.364   | 0.158 | 1.718          | 0.778   | 0.027 |
| X <sub>1</sub> <sup>^2</sup>                | 0.170         | 0.107   | 0.113 | -0.184                 | 0.288   | 0.524 | 0.170             | 0.155   | 0.272 | -0.087            | 0.049   | 0.074 | 0.083          | 0.051   | 0.105 |
| X <sub>2</sub> : Students in the area       | -0.897        | 0.512   | 0.080 | 1.077                  | 0.804   | 0.180 | -1.407            | 1.037   | 0.175 | 0.554             | 0.487   | 0.256 | -1.958         | 1.804   | 0.278 |
| X <sub>2</sub> <sup>^2</sup>                | 0.059         | 0.101   | 0.563 | -0.060                 | 0.196   | 0.758 | 0.300             | 0.267   | 0.260 | -0.061            | 0.076   | 0.417 | 0.467          | 0.308   | 0.129 |
| X <sub>1</sub> * X <sub>2</sub>             | 0.175         | 0.266   | 0.511 | -0.274                 | 0.369   | 0.459 | -0.326            | 0.402   | 0.417 | -0.065            | 0.110   | 0.552 | -0.486         | 0.245   | 0.048 |
| International Collaboration                 | 0.038         | 0.010   | 0.000 | -0.010                 | 0.010   | 0.328 | 0.025             | 0.013   | 0.059 | 0.001             | 0.015   | 0.954 | 0.048          | 0.011   | 0.000 |
| Specialization Index                        | -5.387        | 0.813   | 0.000 | -2.582                 | 0.765   | 0.001 | -4.532            | 0.892   | 0.000 | 2.388             | 1.473   | 0.105 | -2.350         | 0.860   | 0.006 |
| Base foundation year                        | 0.000         | 0.000   | 0.314 | 0.001                  | 0.000   | 0.000 | 0.000             | 0.000   | 0.622 | 0.000             | 0.000   | 0.817 | 0.000          | 0.000   | 0.920 |
| Legal status (ref. Public university)       |               |         |       |                        |         |       |                   |         |       |                   |         |       |                |         |       |
| Private university                          | -0.732        | 0.800   | 0.360 | 0.532                  | 0.733   | 0.468 |                   |         |       | -0.822            | 0.456   | 0.071 | 1.619          | 0.614   | 0.008 |
| University size (students enrolled)         | -0.005        | 0.005   | 0.241 | 0.005                  | 0.005   | 0.324 | -0.006            | 0.004   | 0.116 | 0.017             | 0.007   | 0.016 | -0.009         | 0.007   | 0.229 |
| Total publications in the area              | 0.007         | 0.003   | 0.047 | 0.261                  | 0.021   | 0.000 | 0.046             | 0.007   | 0.000 | 0.161             | 0.025   | 0.000 | 0.029          | 0.003   | 0.000 |
| Constant                                    | 10.100        | 2.994   | 0.001 | -5.531                 | 3.012   | 0.066 | 10.059            | 2.157   | 0.000 | -0.609            | 2.324   | 0.793 | 5.750          | 5.689   | 0.312 |
|                                             | Correlation   | Chi2(1) | Sign  | Correlation            | Chi2(1) | Sign  | Correlation       | Chi2(1) | Sign  | Correlation       | Chi2(1) | Sign  | Correlation    | Chi2(1) | Sign  |
| BP test                                     | 0.071         | 0.977   | 0.323 | 0.197                  | 5.576   | 0.018 | -0.103            | 1.470   | 0.225 | -0.065            | 0.130   | 0.718 | -0.143         | 3.540   | 0.060 |

## TOP25% PUBLICATION

Table S3. SUR estimates: reduced Translog function

|                                             | F05 - Science |         |       | F06 - Computer Science |         |       | F07 - Engineering |         |       | F08 - Agriculture |         |       | F09 - Medicine |         |       |
|---------------------------------------------|---------------|---------|-------|------------------------|---------|-------|-------------------|---------|-------|-------------------|---------|-------|----------------|---------|-------|
|                                             | Coeff         | SE      | Sign. | Coeff                  | SE      | Sign. | Coeff             | SE      | Sign. | Coeff             | SE      | Sign. | Coeff          | SE      | Sign. |
| <b>OUTPUT Eq. 1: GRADUATES</b>              |               |         |       |                        |         |       |                   |         |       |                   |         |       |                |         |       |
| X <sub>1</sub> : Academic staff in the area | 0.426         | 0.244   | 0.081 | 0.748                  | 0.740   | 0.313 | -0.806            | 0.499   | 0.106 | -0.274            | 0.337   | 0.416 | 0.062          | 0.241   | 0.797 |
| X <sub>1</sub> <sup>^2</sup>                | 0.075         | 0.049   | 0.127 | -0.099                 | 0.192   | 0.606 | -0.186            | 0.082   | 0.023 | 0.019             | 0.050   | 0.695 | -0.029         | 0.020   | 0.148 |
| X <sub>2</sub> : Students in the area       | 0.891         | 0.222   | 0.000 | 1.090                  | 0.472   | 0.021 | 2.304             | 0.551   | 0.000 | -0.070            | 0.435   | 0.872 | 0.656          | 0.450   | 0.145 |
| X <sub>2</sub> <sup>^2</sup>                | 0.092         | 0.048   | 0.054 | -0.008                 | 0.123   | 0.950 | -0.333            | 0.142   | 0.019 | 0.121             | 0.067   | 0.072 | 0.037          | 0.078   | 0.636 |
| X <sub>1</sub> * X <sub>2</sub>             | -0.221        | 0.123   | 0.073 | -0.110                 | 0.250   | 0.658 | 0.433             | 0.218   | 0.047 | 0.061             | 0.098   | 0.536 | 0.011          | 0.077   | 0.891 |
| Constant                                    | -2.266        | 1.198   | 0.059 | -2.719                 | 1.676   | 0.105 | -3.582            | 1.135   | 0.002 | 2.817             | 1.687   | 0.095 | -0.084         | 1.394   | 0.952 |
| <b>OUTPUT Eq. 2: PUB25</b>                  |               |         |       |                        |         |       |                   |         |       |                   |         |       |                |         |       |
| X <sub>1</sub> : Academic staff in the area | -0.624        | 0.583   | 0.285 | -1.632                 | 1.448   | 0.260 | -1.271            | 1.356   | 0.348 | -0.644            | 0.609   | 0.291 | 0.736          | 0.698   | 0.292 |
| X <sub>1</sub> <sup>^2</sup>                | 0.452         | 0.117   | 0.000 | 0.380                  | 0.376   | 0.312 | 0.245             | 0.222   | 0.269 | -0.142            | 0.090   | 0.113 | 0.205          | 0.058   | 0.000 |
| X <sub>2</sub> : Students in the area       | -0.088        | 0.531   | 0.869 | 1.807                  | 0.922   | 0.050 | 0.208             | 1.497   | 0.889 | -1.713            | 0.787   | 0.030 | -3.229         | 1.305   | 0.013 |
| X <sub>2</sub> <sup>^2</sup>                | 0.044         | 0.114   | 0.700 | -0.366                 | 0.241   | 0.128 | -0.161            | 0.386   | 0.676 | 0.224             | 0.122   | 0.065 | 0.512          | 0.225   | 0.023 |
| X <sub>1</sub> * X <sub>2</sub>             | -0.121        | 0.295   | 0.681 | 0.240                  | 0.488   | 0.623 | 0.221             | 0.591   | 0.709 | 0.392             | 0.178   | 0.027 | -0.251         | 0.224   | 0.262 |
| Constant                                    | 4.366         | 2.867   | 0.128 | 0.443                  | 3.278   | 0.892 | 7.845             | 3.084   | 0.011 | 10.601            | 3.052   | 0.001 | 13.870         | 4.041   | 0.001 |
|                                             | Correlation   | Chi2(1) | Sign  | Correlation            | Chi2(1) | Sign  | Correlation       | Chi2(1) | Sign  | Correlation       | Chi2(1) | Sign  | Correlation    | Chi2(1) | Sign  |
| BP test                                     | 0.2189        | 9.39    | 0.002 | 0.4426                 | 28.21   | 0.000 | 0.264             | 9.685   | 0.002 | 0.0573            | 0.102   | 0.750 | 0.0963         | 1.634   | 0.201 |

Table S4. SUR estimates: extended Translog function with control factors

|                                             | F05 - Science |         |       | F06 - Computer Science |         |       | F07 - Engineering |         |       | F08 - Agriculture |         |       | F09 - Medicine |         |       |
|---------------------------------------------|---------------|---------|-------|------------------------|---------|-------|-------------------|---------|-------|-------------------|---------|-------|----------------|---------|-------|
|                                             | Coeff         | SE      | Sign. | Coeff                  | SE      | Sign. | Coeff             | SE      | Sign. | Coeff             | SE      | Sign. | Coeff          | SE      | Sign. |
| <b>OUTPUT Eq. 1: GRADUATES</b>              |               |         |       |                        |         |       |                   |         |       |                   |         |       |                |         |       |
| X <sub>1</sub> : Academic staff in the area | 0.424         | 0.245   | 0.093 | 1.462                  | 0.700   | 0.037 | -0.240            | 0.459   | 0.600 | -0.297            | 0.365   | 0.417 | 0.460          | 0.323   | 0.154 |
| X <sub>1</sub> <sup>^2</sup>                | -0.050        | 0.048   | 0.285 | -0.223                 | 0.183   | 0.224 | -0.238            | 0.077   | 0.002 | 0.034             | 0.049   | 0.484 | -0.018         | 0.021   | 0.393 |
| X <sub>2</sub> : Students in the area       | 0.525         | 0.227   | 0.022 | 1.106                  | 0.510   | 0.030 | 1.761             | 0.518   | 0.001 | -0.039            | 0.489   | 0.937 | -1.219         | 0.748   | 0.103 |
| X <sub>2</sub> <sup>^2</sup>                | 0.109         | 0.045   | 0.017 | 0.024                  | 0.124   | 0.848 | -0.200            | 0.133   | 0.133 | 0.111             | 0.076   | 0.145 | 0.350          | 0.127   | 0.006 |
| X <sub>1</sub> * X <sub>2</sub>             | -0.109        | 0.118   | 0.378 | -0.212                 | 0.234   | 0.367 | 0.303             | 0.201   | 0.131 | 0.054             | 0.110   | 0.622 | -0.120         | 0.102   | 0.239 |
| International Collaboration                 | 0.018         | 0.004   | 0.000 | 0.000                  | 0.006   | 0.988 | 0.004             | 0.007   | 0.549 | -0.002            | 0.015   | 0.920 | 0.016          | 0.005   | 0.001 |
| Specialization Index                        | -1.138        | 0.354   | 0.001 | -0.314                 | 0.485   | 0.517 | 0.137             | 0.446   | 0.758 | -1.734            | 1.478   | 0.240 | -0.805         | 0.356   | 0.024 |
| Base foundation year                        | 0.000         | 0.000   | 0.966 | 0.000                  | 0.000   | 0.036 | 0.000             | 0.000   | 0.366 | 0.000             | 0.000   | 0.775 | 0.000          | 0.000   | 0.018 |
| Legal status (ref. Public university)       |               |         |       |                        |         |       |                   |         |       |                   |         |       |                |         |       |
| Private university                          | -0.240        | 0.355   | 0.494 | 0.355                  | 0.465   | 0.445 |                   |         |       | 0.485             | 0.457   | 0.288 | 0.271          | 0.255   | 0.288 |
| University size (# students enrolled)       | -0.003        | 0.002   | 0.174 | 0.003                  | 0.003   | 0.403 | -0.002            | 0.002   | 0.295 | -0.012            | 0.007   | 0.080 | -0.012         | 0.003   | 0.000 |
| Total publications in the area              | 0.004         | 0.002   | 0.013 | 0.056                  | 0.013   | 0.000 | 0.017             | 0.004   | 0.000 | 0.029             | 0.025   | 0.234 | 0.002          | 0.001   | 0.123 |
| Constant                                    | -0.405        | 1.319   | 0.792 | -4.804                 | 1.911   | 0.012 | -3.673            | 1.078   | 0.001 | 4.324             | 2.332   | 0.064 | 4.930          | 2.358   | 0.037 |
| <b>OUTPUT Eq. 2: PUB25</b>                  |               |         |       |                        |         |       |                   |         |       |                   |         |       |                |         |       |
| X <sub>1</sub> : Academic staff in the area | -1.106        | 0.556   | 0.130 | 1.458                  | 0.853   | 0.087 | 0.452             | 0.869   | 0.603 | 0.587             | 0.327   | 0.073 | 1.268          | 0.766   | 0.098 |
| X <sub>1</sub> <sup>^2</sup>                | 0.151         | 0.108   | 0.113 | -0.165                 | 0.223   | 0.458 | 0.146             | 0.147   | 0.321 | -0.086            | 0.044   | 0.048 | 0.069          | 0.050   | 0.171 |
| X <sub>2</sub> : Students in the area       | -1.030        | 0.515   | 0.080 | 0.810                  | 0.621   | 0.192 | -1.149            | 0.982   | 0.242 | 0.534             | 0.437   | 0.222 | -2.803         | 1.774   | 0.114 |
| X <sub>2</sub> <sup>^2</sup>                | 0.018         | 0.101   | 0.563 | -0.066                 | 0.151   | 0.662 | 0.224             | 0.252   | 0.376 | -0.053            | 0.068   | 0.433 | 0.517          | 0.302   | 0.088 |
| X <sub>1</sub> * X <sub>2</sub>             | 0.300         | 0.267   | 0.511 | -0.170                 | 0.285   | 0.552 | -0.232            | 0.381   | 0.541 | -0.081            | 0.098   | 0.413 | -0.341         | 0.241   | 0.158 |
| International Collaboration                 | 0.030         | 0.010   | 0.000 | -0.011                 | 0.008   | 0.166 | 0.018             | 0.012   | 0.142 | 0.010             | 0.014   | 0.445 | 0.038          | 0.011   | 0.001 |
| Specialization Index                        | -5.909        | 0.804   | 0.000 | -2.355                 | 0.591   | 0.000 | -4.237            | 0.845   | 0.000 | 1.197             | 1.322   | 0.365 | -2.127         | 0.846   | 0.012 |
| Base foundation year                        | 0.000         | 0.000   | 0.314 | 0.001                  | 0.000   | 0.000 | 0.000             | 0.000   | 0.300 | 0.000             | 0.000   | 0.542 | 0.000          | 0.000   | 0.607 |
| Legal status (ref. Public university)       |               |         |       |                        |         |       |                   |         |       |                   |         |       |                |         |       |
| Private university                          | -0.657        | 0.806   | 0.360 | -0.266                 | 0.567   | 0.638 |                   |         |       | -0.338            | 0.409   | 0.408 | 1.491          | 0.604   | 0.014 |
| University size (students enrolled)         | -0.006        | 0.005   | 0.241 | 0.005                  | 0.004   | 0.228 | -0.005            | 0.004   | 0.168 | 0.014             | 0.006   | 0.029 | -0.008         | 0.007   | 0.275 |
| Total publications in the area              | 0.004         | 0.003   | 0.047 | 0.228                  | 0.016   | 0.000 | 0.043             | 0.007   | 0.000 | 0.160             | 0.022   | 0.000 | 0.028          | 0.003   | 0.000 |
| Constant                                    | 13.185        | 2.992   | 0.001 | -2.496                 | 2.327   | 0.284 | 10.525            | 2.043   | 0.000 | 0.055             | 2.086   | 0.979 | 11.301         | 5.596   | 0.043 |
|                                             | Correlation   | Chi2(1) | Sign  | Correlation            | Chi2(1) | Sign  | Correlation       | Chi2(1) | Sign  | Correlation       | Chi2(1) | Sign  | Correlation    | Chi2(1) | Sign  |
| BP test                                     | 0.026         | 0.149   | 0.700 | 0.248                  | 8.867   | 0.003 | -0.103            | 1.470   | 0.225 | -0.117            | 0.426   | 0.514 | -0.169         | 4.929   | 0.026 |

## TOP 10% CITATIONS

Table S5. SUR estimates: reduced Translog function

|                                             | F05 - Science |         |       | F06 - Computer Science |         |       | F07 - Engineering |         |       | F08 - Agriculture |         |       | F09 - Medicine |         |       |
|---------------------------------------------|---------------|---------|-------|------------------------|---------|-------|-------------------|---------|-------|-------------------|---------|-------|----------------|---------|-------|
|                                             | Coeff         | SE      | Sign. | Coeff                  | SE      | Sign. | Coeff             | SE      | Sign. | Coeff             | SE      | Sign. | Coeff          | SE      | Sign. |
| <b>OUTPUT Eq. 1: GRADUATES</b>              |               |         |       |                        |         |       |                   |         |       |                   |         |       |                |         |       |
| X <sub>1</sub> : Academic staff in the area | 0.377         | 0.238   | 0.113 | 0.748                  | 0.740   | 0.313 | -0.806            | 0.499   | 0.106 | -0.274            | 0.337   | 0.416 | 0.062          | 0.241   | 0.797 |
| X <sub>1</sub> <sup>^2</sup>                | 0.069         | 0.048   | 0.150 | -0.099                 | 0.192   | 0.606 | -0.186            | 0.082   | 0.023 | 0.019             | 0.050   | 0.695 | -0.029         | 0.020   | 0.148 |
| X <sub>2</sub> : Students in the area       | 0.891         | 0.216   | 0.000 | 1.090                  | 0.472   | 0.021 | 2.304             | 0.551   | 0.000 | -0.070            | 0.435   | 0.872 | 0.656          | 0.450   | 0.145 |
| X <sub>2</sub> <sup>^2</sup>                | 0.085         | 0.046   | 0.066 | -0.008                 | 0.123   | 0.950 | -0.333            | 0.142   | 0.019 | 0.121             | 0.067   | 0.072 | 0.037          | 0.078   | 0.636 |
| X <sub>1</sub> * X <sub>2</sub>             | -0.203        | 0.120   | 0.091 | -0.110                 | 0.250   | 0.658 | 0.433             | 0.218   | 0.047 | 0.061             | 0.098   | 0.536 | 0.011          | 0.077   | 0.891 |
| Constant                                    | -2.084        | 1.168   | 0.075 | -2.719                 | 1.676   | 0.105 | -3.582            | 1.135   | 0.002 | 2.817             | 1.687   | 0.095 | -0.084         | 1.394   | 0.952 |
| <b>OUTPUT Eq. 2: CIT10</b>                  |               |         |       |                        |         |       |                   |         |       |                   |         |       |                |         |       |
| X <sub>1</sub> : Academic staff in the area | -0.282        | 0.670   | 0.674 | -2.553                 | 1.461   | 0.080 | -1.357            | 1.805   | 0.452 | -1.000            | 0.618   | 0.106 | 1.561          | 0.846   | 0.065 |
| X <sub>1</sub> <sup>^2</sup>                | 0.629         | 0.135   | 0.000 | 0.453                  | 0.379   | 0.232 | 0.447             | 0.295   | 0.130 | -0.159            | 0.091   | 0.080 | 0.277          | 0.070   | 0.000 |
| X <sub>2</sub> : Students in the area       | 0.215         | 0.608   | 0.723 | 2.145                  | 0.931   | 0.021 | 0.166             | 1.993   | 0.934 | -1.796            | 0.799   | 0.025 | -3.658         | 1.582   | 0.021 |
| X <sub>2</sub> <sup>^2</sup>                | 0.150         | 0.131   | 0.251 | -0.496                 | 0.243   | 0.041 | -0.105            | 0.514   | 0.838 | 0.197             | 0.123   | 0.111 | 0.654          | 0.273   | 0.017 |
| X <sub>1</sub> * X <sub>2</sub>             | -0.464        | 0.338   | 0.170 | 0.406                  | 0.492   | 0.409 | 0.006             | 0.787   | 0.994 | 0.538             | 0.180   | 0.003 | -0.533         | 0.271   | 0.049 |
| Constant                                    | 2.468         | 3.290   | 0.453 | 2.340                  | 3.307   | 0.479 | 8.646             | 4.105   | 0.035 | 11.743            | 3.099   | 0.000 | 13.997         | 4.900   | 0.004 |
|                                             | Correlation   | Chi2(1) | Sign  | Correlation            | Chi2(1) | Sign  | Correlation       | Chi2(1) | Sign  | Correlation       | Chi2(1) | Sign  | Correlation    | Chi2(1) | Sign  |
| BP test                                     | 0.2749        | 14.737  | 0.000 | 0.3926                 | 22.199  | 0.000 | 0.2114            | 6.212   | 0.013 | 0.0264            | 0.022   | 0.883 | 0.1056         | 1.963   | 0.161 |

Table S6. SUR estimates: extended Translog function with control factors

|                                             | F05 - Science |         |       | F06 - Computer Science |         |       | F07 - Engineering |         |       | F08 - Agriculture |         |       | F09 - Medicine |         |       |
|---------------------------------------------|---------------|---------|-------|------------------------|---------|-------|-------------------|---------|-------|-------------------|---------|-------|----------------|---------|-------|
|                                             | Coeff         | SE      | Sign. | Coeff                  | SE      | Sign. | Coeff             | SE      | Sign. | Coeff             | SE      | Sign. | Coeff          | SE      | Sign. |
| <b>OUTPUT Eq. 1: GRADUATES</b>              |               |         |       |                        |         |       |                   |         |       |                   |         |       |                |         |       |
| X <sub>1</sub> : Academic staff in the area | 0.436         | 0.239   | 0.068 | 1.462                  | 0.700   | 0.037 | -0.240            | 0.459   | 0.600 | -0.297            | 0.365   | 0.417 | 0.460          | 0.323   | 0.154 |
| X <sub>1</sub> <sup>^2</sup>                | -0.053        | 0.046   | 0.256 | -0.223                 | 0.183   | 0.224 | -0.238            | 0.077   | 0.002 | 0.034             | 0.049   | 0.484 | -0.018         | 0.021   | 0.393 |
| X <sub>2</sub> : Students in the area       | 0.554         | 0.221   | 0.012 | 1.106                  | 0.510   | 0.030 | 1.761             | 0.518   | 0.001 | -0.039            | 0.489   | 0.937 | -1.219         | 0.748   | 0.103 |
| X <sub>2</sub> <sup>^2</sup>                | 0.108         | 0.044   | 0.013 | 0.024                  | 0.124   | 0.848 | -0.200            | 0.133   | 0.133 | 0.111             | 0.076   | 0.145 | 0.350          | 0.127   | 0.006 |
| X <sub>1</sub> * X <sub>2</sub>             | -0.113        | 0.114   | 0.324 | -0.212                 | 0.234   | 0.367 | 0.303             | 0.201   | 0.131 | 0.054             | 0.110   | 0.622 | -0.120         | 0.102   | 0.239 |
| International Collaboration                 | 0.017         | 0.004   | 0.000 | 0.000                  | 0.006   | 0.988 | 0.004             | 0.007   | 0.549 | -0.002            | 0.015   | 0.920 | 0.016          | 0.005   | 0.001 |
| Specialization Index                        | -0.929        | 0.350   | 0.008 | -0.314                 | 0.485   | 0.517 | 0.137             | 0.446   | 0.758 | -1.734            | 1.478   | 0.240 | -0.805         | 0.356   | 0.024 |
| Base foundation year                        | 0.000         | 0.000   | 0.971 | 0.000                  | 0.000   | 0.036 | 0.000             | 0.000   | 0.366 | 0.000             | 0.000   | 0.775 | 0.000          | 0.000   | 0.018 |
| Legal status (ref. Public university)       |               |         |       |                        |         |       |                   |         |       |                   |         |       |                |         |       |
| Private university                          | -0.225        | 0.346   | 0.515 | 0.355                  | 0.465   | 0.445 |                   |         |       | 0.485             | 0.457   | 0.288 | 0.271          | 0.255   | 0.288 |
| University size (# students enrolled)       | -0.003        | 0.002   | 0.157 | 0.000                  | 0.000   | 0.403 | 0.000             | 0.000   | 0.295 | 0.000             | 0.000   | 0.080 | 0.000          | 0.000   | 0.000 |
| Total publications in the area              | 0.004         | 0.002   | 0.003 | 0.056                  | 0.013   | 0.000 | 0.017             | 0.004   | 0.000 | 0.029             | 0.025   | 0.234 | 0.002          | 0.001   | 0.123 |
| Constant                                    | -0.621        | 1.286   | 0.629 | -4.804                 | 1.911   | 0.012 | -3.673            | 1.078   | 0.001 | 4.324             | 2.332   | 0.064 | 4.930          | 2.358   | 0.037 |
| <b>OUTPUT Eq. 2: CIT10</b>                  |               |         |       |                        |         |       |                   |         |       |                   |         |       |                |         |       |
| X <sub>1</sub> : Academic staff in the area | -0.820        | 0.624   | 0.189 | 0.272                  | 0.913   | 0.766 | 0.996             | 1.199   | 0.406 | 0.091             | 0.412   | 0.825 | 1.997          | 0.930   | 0.032 |
| X <sub>1</sub> <sup>^2</sup>                | 0.238         | 0.121   | 0.050 | -0.252                 | 0.238   | 0.291 | 0.361             | 0.202   | 0.074 | -0.091            | 0.055   | 0.099 | 0.112          | 0.061   | 0.066 |
| X <sub>2</sub> : Students in the area       | -1.208        | 0.578   | 0.037 | 1.034                  | 0.665   | 0.120 | -1.808            | 1.353   | 0.182 | 0.286             | 0.551   | 0.604 | -3.268         | 2.154   | 0.129 |
| X <sub>2</sub> <sup>^2</sup>                | 0.168         | 0.114   | 0.140 | -0.262                 | 0.162   | 0.106 | 0.452             | 0.348   | 0.194 | -0.065            | 0.086   | 0.445 | 0.670          | 0.367   | 0.068 |
| X <sub>1</sub> * X <sub>2</sub>             | 0.061         | 0.299   | 0.839 | 0.289                  | 0.306   | 0.344 | -0.661            | 0.525   | 0.208 | 0.101             | 0.124   | 0.414 | -0.587         | 0.293   | 0.045 |
| International Collaboration                 | 0.048         | 0.011   | 0.000 | 0.012                  | 0.008   | 0.137 | 0.038             | 0.017   | 0.026 | 0.017             | 0.017   | 0.325 | 0.058          | 0.013   | 0.000 |
| Specialization Index                        | -6.337        | 0.916   | 0.000 | -1.924                 | 0.632   | 0.002 | -6.090            | 1.165   | 0.000 | 0.502             | 1.666   | 0.763 | -2.661         | 1.027   | 0.010 |
| Base foundation year                        | 0.000         | 0.000   | 0.661 | 0.000                  | 0.000   | 0.985 | 0.000             | 0.001   | 0.504 | 0.000             | 0.000   | 0.703 | 0.000          | 0.000   | 0.388 |
| Legal status (ref. Public university)       |               |         |       |                        |         |       |                   |         |       |                   |         |       |                |         |       |
| Private university                          | -0.480        | 0.904   | 0.596 | -0.947                 | 0.607   | 0.118 |                   |         |       | 0.535             | 0.515   | 0.299 | 2.073          | 0.733   | 0.005 |
| University size (students enrolled)         | -0.012        | 0.005   | 0.017 | 0.004                  | 0.004   | 0.273 | -0.006            | 0.005   | 0.214 | 0.009             | 0.008   | 0.241 | -0.014         | 0.009   | 0.124 |
| Total publications in the area              | 0.006         | 0.004   | 0.125 | 0.211                  | 0.017   | 0.000 | 0.049             | 0.009   | 0.000 | 0.150             | 0.028   | 0.000 | 0.031          | 0.004   | 0.000 |
| Constant                                    | 12.704        | 3.361   | 0.000 | 0.594                  | 2.492   | 0.812 | 11.985            | 2.816   | 0.000 | 2.299             | 2.630   | 0.382 | 11.421         | 6.794   | 0.093 |
|                                             | Correlation   | Chi2(1) | Sign  | Correlation            | Chi2(1) | Sign  | Correlation       | Chi2(1) | Sign  | Correlation       | Chi2(1) | Sign  | Correlation    | Chi2(1) | Sign  |
| BP test                                     | 0.072         | 1.004   | 0.316 | 0.216                  | 6.741   | 0.009 | -0.172            | 4.100   | 0.043 | -0.197            | 1.203   | 0.273 | -0.179         | 5.521   | 0.019 |

## TOP 25% CITATIONS

Table S7. SUR estimates: reduced Translog function

|                                             | F05 - Science |         |       | F06 - Computer Science |         |       | F07 - Engineering |         |       | F08 - Agriculture |         |       | F09 - Medicine |         |       |
|---------------------------------------------|---------------|---------|-------|------------------------|---------|-------|-------------------|---------|-------|-------------------|---------|-------|----------------|---------|-------|
|                                             | Coeff         | SE      | Sign. | Coeff                  | SE      | Sign. | Coeff             | SE      | Sign. | Coeff             | SE      | Sign. | Coeff          | SE      | Sign. |
| <b>OUTPUT Eq. 1: GRADUATES</b>              |               |         |       |                        |         |       |                   |         |       |                   |         |       |                |         |       |
| X <sub>1</sub> : Academic staff in the area | 0.377         | 0.238   | 0.113 | 0.748                  | 0.740   | 0.313 | -0.806            | 0.499   | 0.106 | -0.274            | 0.337   | 0.416 | 0.062          | 0.241   | 0.797 |
| X <sub>1</sub> <sup>^2</sup>                | 0.069         | 0.048   | 0.150 | -0.099                 | 0.192   | 0.606 | -0.186            | 0.082   | 0.023 | 0.019             | 0.050   | 0.695 | -0.029         | 0.020   | 0.148 |
| X <sub>2</sub> : Students in the area       | 0.891         | 0.216   | 0.000 | 1.090                  | 0.472   | 0.021 | 2.304             | 0.551   | 0.000 | -0.070            | 0.435   | 0.872 | 0.656          | 0.450   | 0.145 |
| X <sub>2</sub> <sup>^2</sup>                | 0.085         | 0.046   | 0.066 | -0.008                 | 0.123   | 0.950 | -0.333            | 0.142   | 0.019 | 0.121             | 0.067   | 0.072 | 0.037          | 0.078   | 0.636 |
| X <sub>1</sub> * X <sub>2</sub>             | -0.203        | 0.120   | 0.091 | -0.110                 | 0.250   | 0.658 | 0.433             | 0.218   | 0.047 | 0.061             | 0.098   | 0.536 | 0.011          | 0.077   | 0.891 |
| Constant                                    | -2.084        | 1.168   | 0.075 | -2.719                 | 1.676   | 0.105 | -3.582            | 1.135   | 0.002 | 2.817             | 1.687   | 0.095 | -0.084         | 1.394   | 0.952 |
| <b>OUTPUT Eq. 2: CIT25</b>                  |               |         |       |                        |         |       |                   |         |       |                   |         |       |                |         |       |
| X <sub>1</sub> : Academic staff in the area | -0.372        | 0.656   | 0.570 | -2.461                 | 1.397   | 0.078 | -1.541            | 1.756   | 0.380 | -1.038            | 0.605   | 0.087 | 1.480          | 0.828   | 0.074 |
| X <sub>1</sub> <sup>^2</sup>                | 0.587         | 0.132   | 0.000 | 0.466                  | 0.363   | 0.199 | 0.398             | 0.287   | 0.165 | -0.158            | 0.089   | 0.077 | 0.271          | 0.069   | 0.000 |
| X <sub>2</sub> : Students in the area       | 0.117         | 0.596   | 0.844 | 2.263                  | 0.890   | 0.011 | 0.324             | 1.939   | 0.867 | -1.977            | 0.782   | 0.012 | -3.696         | 1.549   | 0.017 |
| X <sub>2</sub> <sup>^2</sup>                | 0.124         | 0.128   | 0.333 | -0.497                 | 0.232   | 0.033 | -0.169            | 0.500   | 0.735 | 0.224             | 0.121   | 0.063 | 0.652          | 0.267   | 0.015 |
| X <sub>1</sub> * X <sub>2</sub>             | -0.375        | 0.331   | 0.258 | 0.359                  | 0.471   | 0.446 | 0.123             | 0.766   | 0.873 | 0.547             | 0.176   | 0.002 | -0.505         | 0.265   | 0.057 |
| Constant                                    | 3.684         | 3.223   | 0.253 | 2.229                  | 3.163   | 0.481 | 9.115             | 3.993   | 0.022 | 12.845            | 3.033   | 0.000 | 14.783         | 4.798   | 0.002 |
|                                             | Correlation   | Chi2(1) | Sign  | Correlation            | Chi2(1) | Sign  | Correlation       | Chi2(1) | Sign  | Correlation       | Chi2(1) | Sign  | Correlation    | Chi2(1) | Sign  |
| BP test                                     | 0.248         | 11.991  | 0.001 | 0.3995                 | 22.978  | 0.000 | 0.227             | 6.892   | 0.009 | -0.0088           | 0.002   | 0.961 | 0.0802         | 1.132   | 0.287 |

Table S8. SUR estimates: extended Translog function with control factors

|                                             | F05 - Science |         |       | F06 - Computer Science |         |       | F07 - Engineering |         |       | F08 - Agriculture |         |       | F09 - Medicine |         |       |
|---------------------------------------------|---------------|---------|-------|------------------------|---------|-------|-------------------|---------|-------|-------------------|---------|-------|----------------|---------|-------|
|                                             | Coeff         | SE      | Sign. | Coeff                  | SE      | Sign. | Coeff             | SE      | Sign. | Coeff             | SE      | Sign. | Coeff          | SE      | Sign. |
| <b>OUTPUT Eq. 1: GRADUATES</b>              |               |         |       |                        |         |       |                   |         |       |                   |         |       |                |         |       |
| X <sub>1</sub> : Academic staff in the area | 0.436         | 0.239   | 0.068 | 1.462                  | 0.700   | 0.037 | -0.240            | 0.459   | 0.600 | -0.297            | 0.365   | 0.417 | 0.460          | 0.323   | 0.154 |
| X <sub>1</sub> <sup>^2</sup>                | -0.053        | 0.046   | 0.256 | -0.223                 | 0.183   | 0.224 | -0.238            | 0.077   | 0.002 | 0.034             | 0.049   | 0.484 | -0.018         | 0.021   | 0.393 |
| X <sub>2</sub> : Students in the area       | 0.554         | 0.221   | 0.012 | 1.106                  | 0.510   | 0.030 | 1.761             | 0.518   | 0.001 | -0.039            | 0.489   | 0.937 | -1.219         | 0.748   | 0.103 |
| X <sub>2</sub> <sup>^2</sup>                | 0.108         | 0.044   | 0.013 | 0.024                  | 0.124   | 0.848 | -0.200            | 0.133   | 0.133 | 0.111             | 0.076   | 0.145 | 0.350          | 0.127   | 0.006 |
| X <sub>1</sub> * X <sub>2</sub>             | -0.113        | 0.114   | 0.324 | -0.212                 | 0.234   | 0.367 | 0.303             | 0.201   | 0.131 | 0.054             | 0.110   | 0.622 | -0.120         | 0.102   | 0.239 |
| International Collaboration                 | 0.017         | 0.004   | 0.000 | 0.000                  | 0.006   | 0.988 | 0.004             | 0.007   | 0.549 | -0.002            | 0.015   | 0.920 | 0.016          | 0.005   | 0.001 |
| Specialization Index                        | -0.929        | 0.350   | 0.008 | -0.314                 | 0.485   | 0.517 | 0.137             | 0.446   | 0.758 | -1.734            | 1.478   | 0.240 | -0.805         | 0.356   | 0.024 |
| Base foundation year                        | 0.000         | 0.000   | 0.971 | 0.000                  | 0.000   | 0.036 | 0.000             | 0.000   | 0.366 | 0.000             | 0.000   | 0.775 | 0.000          | 0.000   | 0.018 |
| Legal status (ref. Public university)       |               |         |       |                        |         |       |                   |         |       |                   |         |       |                |         |       |
| Private university                          | -0.225        | 0.346   | 0.515 | 0.355                  | 0.465   | 0.445 |                   |         |       | 0.485             | 0.457   | 0.288 | 0.271          | 0.255   | 0.288 |
| University size (# students enrolled)       | -0.003        | 0.002   | 0.157 | 0.003                  | 0.003   | 0.403 | -0.002            | 0.002   | 0.295 | -0.012            | 0.007   | 0.080 | -0.012         | 0.003   | 0.000 |
| Total publications in the area              | 0.000         | 0.000   | 0.003 | 0.001                  | 0.000   | 0.000 | 0.000             | 0.000   | 0.000 | 0.000             | 0.000   | 0.234 | 0.000          | 0.000   | 0.123 |
| Constant                                    | -0.621        | 1.286   | 0.629 | -4.804                 | 1.911   | 0.012 | -3.673            | 1.078   | 0.001 | 4.324             | 2.332   | 0.064 | 4.930          | 2.358   | 0.037 |
| <b>OUTPUT Eq. 2: CIT25</b>                  |               |         |       |                        |         |       |                   |         |       |                   |         |       |                |         |       |
| X <sub>1</sub> : Academic staff in the area | -0.922        | 0.614   | 0.134 | 0.141                  | 0.855   | 0.869 | 0.697             | 1.157   | 0.547 | 0.066             | 0.392   | 0.866 | 1.906          | 0.910   | 0.036 |
| X <sub>1</sub> <sup>^2</sup>                | 0.215         | 0.119   | 0.071 | -0.232                 | 0.223   | 0.299 | 0.303             | 0.195   | 0.121 | -0.091            | 0.052   | 0.082 | 0.107          | 0.060   | 0.073 |
| X <sub>2</sub> : Students in the area       | -1.268        | 0.570   | 0.026 | 1.248                  | 0.623   | 0.045 | -1.524            | 1.306   | 0.243 | 0.089             | 0.524   | 0.865 | -3.128         | 2.108   | 0.138 |
| X <sub>2</sub> <sup>^2</sup>                | 0.140         | 0.112   | 0.212 | -0.298                 | 0.152   | 0.050 | 0.353             | 0.336   | 0.294 | -0.032            | 0.081   | 0.691 | 0.640          | 0.360   | 0.075 |
| X <sub>1</sub> * X <sub>2</sub>             | 0.137         | 0.295   | 0.641 | 0.310                  | 0.286   | 0.278 | -0.496            | 0.506   | 0.327 | 0.108             | 0.118   | 0.359 | -0.555         | 0.287   | 0.053 |
| International Collaboration                 | 0.042         | 0.011   | 0.000 | 0.019                  | 0.008   | 0.014 | 0.037             | 0.017   | 0.027 | 0.018             | 0.016   | 0.266 | 0.055          | 0.013   | 0.000 |
| Specialization Index                        | -6.380        | 0.902   | 0.000 | -1.984                 | 0.592   | 0.001 | -5.889            | 1.124   | 0.000 | 0.308             | 1.585   | 0.846 | -2.586         | 1.005   | 0.010 |
| Base foundation year                        | 0.000         | 0.000   | 0.776 | 0.000                  | 0.000   | 0.816 | 0.000             | 0.000   | 0.356 | 0.000             | 0.000   | 0.609 | 0.000          | 0.000   | 0.292 |
| Legal status (ref. Public university)       |               |         |       |                        |         |       |                   |         |       |                   |         |       |                |         |       |
| Private university                          | -0.571        | 0.890   | 0.521 | -1.013                 | 0.568   | 0.074 |                   |         |       | 0.587             | 0.490   | 0.231 | 2.048          | 0.718   | 0.004 |
| University size (students enrolled)         | -0.013        | 0.005   | 0.011 | 0.005                  | 0.004   | 0.220 | -0.006            | 0.005   | 0.215 | 0.010             | 0.008   | 0.207 | -0.012         | 0.009   | 0.167 |
| Total publications in the area              | 0.005         | 0.004   | 0.171 | 0.195                  | 0.016   | 0.000 | 0.048             | 0.009   | 0.000 | 0.147             | 0.026   | 0.000 | 0.030          | 0.004   | 0.000 |
| Constant                                    | 14.139        | 3.309   | 0.000 | 0.450                  | 2.333   | 0.847 | 12.455            | 2.718   | 0.000 | 3.380             | 2.501   | 0.177 | 11.822         | 6.651   | 0.075 |
|                                             | Correlation   | Chi2(1) | Sign  | Correlation            | Chi2(1) | Sign  | Correlation       | Chi2(1) | Sign  | Correlation       | Chi2(1) | Sign  | Correlation    | Chi2(1) | Sign  |
| BP test                                     | 0.046         | 0.420   | 0.517 | 0.241                  | 8.379   | 0.004 | -0.153            | 3.250   | 0.071 | -0.273            | 2.317   | 0.128 | -0.208         | 7.516   | 0.006 |
